# Supplementary material for: HaMStR: Profile hidden markov model based search for orthologs in ESTs
Source: Springer Nature journal article supplement (doi:10.1186/1471-2148-9-157), 2009-01-01

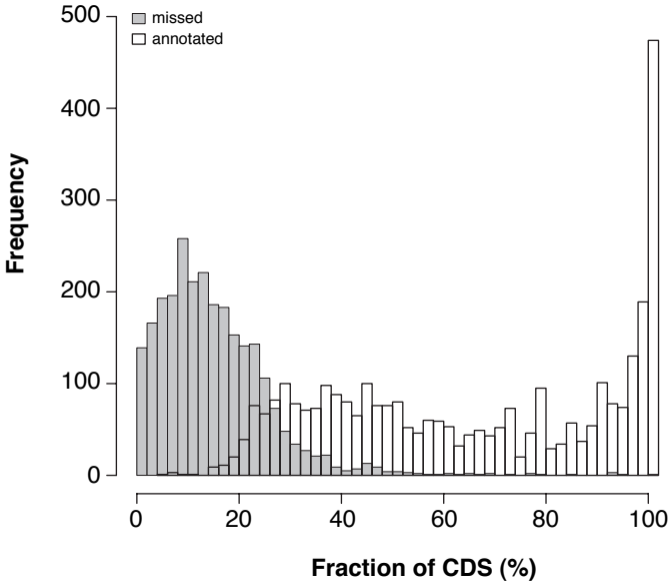

Supplement: 12862_2008_1071_MOESM4_ESM.pdf [file 12862_2008_1071_MOESM4_ESM.pdf]
